# Supplementary material
Source: PubMed Central journal article supplement (PMC4178433)

## **Table S1. Oligonucleotide sequences**

**Figure S1. *Thm1* cko cystic kidney disease initiates by P15.** Histological analyses of P10, P15 and P20 wt and *Thm1* cko kidneys.

**Figure S2. Proliferation persists in P20 *Thm1* cko medulla.** (A) Immunostaining of P20 wt and *Thm1* cko kidney sections for PCNA. In wt kidney, band of PCNA+ cells on left side of section is cortex. Note marked reduction in PCNA+ cells in medulla, right of cortex. Similar corticomedullary region is photographed for *Thm1* cko kidney. Note absence of a reduction in PCNA+ cells in *Thm1* cko medulla. All scale bars represent 500 $\mu$ m. (B) Proliferation rates in cortices and medullas of 3 wt and 3 *Thm1* cko mice.

**Figure S3. Deletion of *Thm1* at 5 weeks of age does not cause renal cysts 3 months following deletion.** Histological analyses of wt and *Thm1* cko kidneys 3 months following injection of mice with tamoxifen at 5 weeks of age.

**Figure S4. GLI protein levels are similar between wt and *Thm1*<sup>aln/aln</sup> whole kidney extract.** Representative Western blot analyses of protein extracts from (A) E13.5 wt and *Thm1*<sup>aln/aln</sup> kidneys cultured in cAMP for 4 days and (B) E18.5 wt and *Thm1*<sup>aln/aln</sup> kidneys. Three cultured kidneys were pooled each for wt and *Thm1*<sup>aln/aln</sup> from 2 organ culture experiments. Kidneys of 2 E18.5 wt and 2 *Thm1*<sup>aln/aln</sup> mice were analyzed separately.

**Figure S5. Small molecule Wnt inhibitors, IWR-1 and IWP-2, do not reduce cystogenic potential of CD1 kidney explants.** E13.5 CD1 kidneys were cultured in the presence of 8-bromo-cAMP, in combination with 10  $\mu$ M, 20  $\mu$ M or 40  $\mu$ M IWR-1 or 10  $\mu$ M, 20  $\mu$ M or 40  $\mu$ M IWP-2 for 4 days. Contralateral kidneys were cultured in control DMSO at concentrations present in IWR-1 and IWP-2 treatments. Graphs represent quantitative assessment of kidney images following 4-day culture. Bars represent mean  $\pm$  SEM.  $n=4$  kidneys.  $*P<0.05$

**Figure S6. SMO inhibitor, Sant1, prevents tubular dilation in CD1 kidneys cultured with cAMP.** E13.5 CD1 kidneys were cultured in the presence of 8-bromo-cAMP, in combination with either control DMSO or 20 $\mu$ M Sant1 for 4 days. Graphs represent quantitative assessment of kidney images following 4-day culture. Bars represent mean  $\pm$  SEM.  $n=10$  kidneys from 2 experiments.  $*P<5.0 \times 10^{-6}$ .

**Table S1. Oligonucleotide Sequences**

|                             |                                 |
|-----------------------------|---------------------------------|
| alndiag F                   | 5'-CGCTGATTA ACTACTATGGTC-3'    |
| alndiag R                   | 5'-GCGTGGTAAAATCGGAAGAC-3'      |
| jck-F                       | 5'-CTTCCCACCTGTTGCTGTTT-3'      |
| jck-R                       | 5'-CAGTGGGCTTACCACCATCT-3'      |
| Pkd1 <sup>m1Bei</sup> -F    | 5'-CTTCCCACCTGTTGCTGTTT-3'      |
| Pkd1 <sup>m1Bei</sup> -R    | 5'-CCTCAGAGCCCTTCAAGTTCTCTCA-3' |
| Pkd1 <sup>m1Bei</sup> probe | 5'-CTTCCCACCTGTTGCTGTTT-3'      |
| Pkd1f-F                     | 5'-CCTGCCTTGCTCTACTTTCC-3'      |
| Pkd1f-R                     | 5'-AGGGCTTTTCTTGCTGGTCT-3'      |
| mPtch1-F                    | 5'-CCTCCTGAACCCCTGGAC-3'        |
| mPtch1-R                    | 5'-CATGCCAAAGAGCTCAACG-3'       |
| mPtch2-F                    | 5'-CCTAGAACAGCTCTGGGTAGAAGT-3'  |
| mPch2-R                     | 5'-CCCAGCTTCTCCTTGGTGTA-3'      |
| mHhip-F                     | 5'-GGCCAGATGGAAGACTACGA-3'      |
| mHhip-R                     | 5'-CCACTCATGACCTCCTGGAC-3'      |
| mGli2-F                     | 5'-GCAGACTGCACCAAGGAGTA-3'      |
| mGli2-R                     | 5'-CGTGGATGTGTTCATTGTTGA-3'     |
| mGli3-F                     | 5'-CACCAAAACAGAACACATTCCA-3'    |
| mGli3-R                     | 5'-GGGGTCTGTGTAACGCTTG-3'       |
| mOaz1-F                     | 5'-GCCTGAGGGCAGTAAGGAC-3'       |
| mOaz1-R                     | 5'-GGAGTAGGGCGGCTCTGT-3'        |

**Figure S1. *Thm1* cko renal tubular dilations begin by P15**

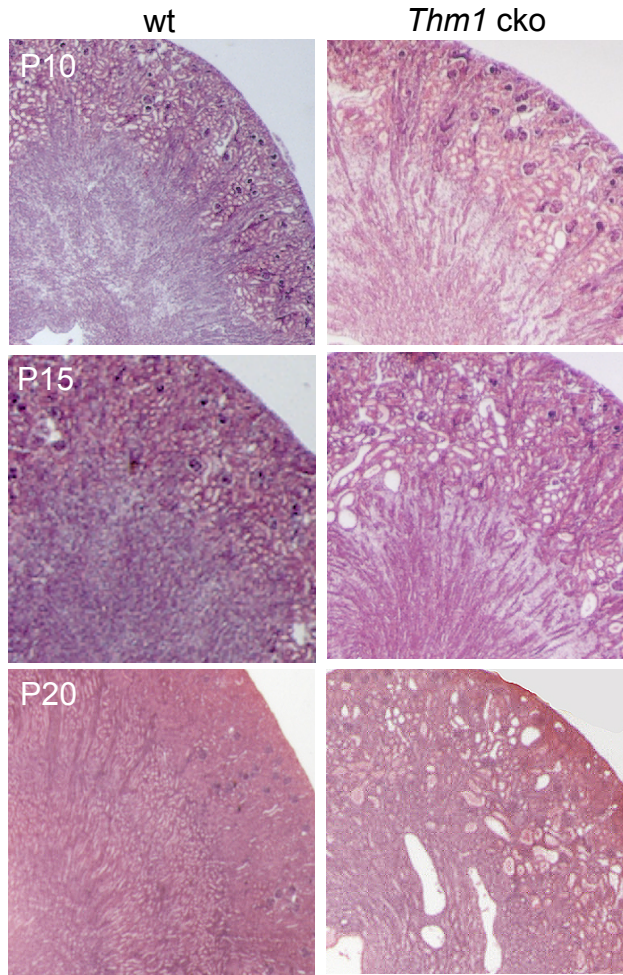

**Figure S2. Proliferation persists in P20 *Thm1* cko kidneys**

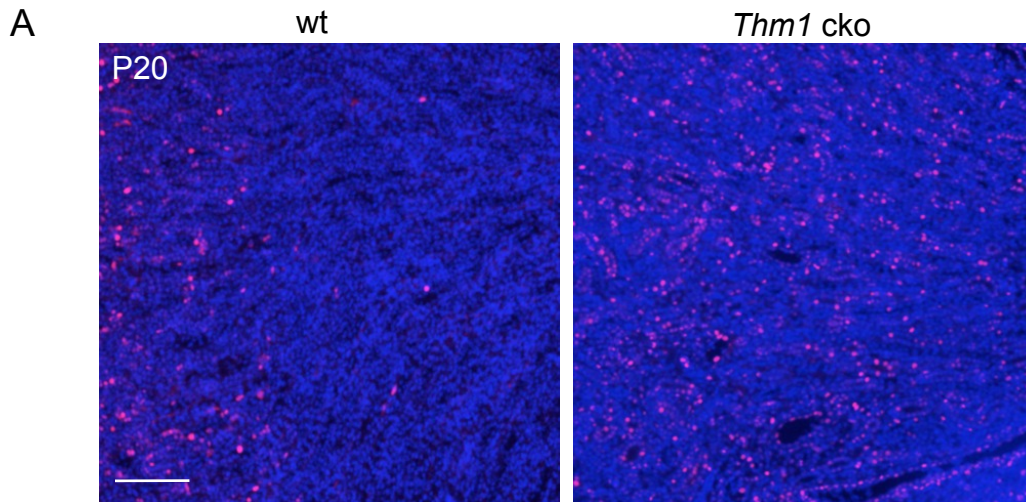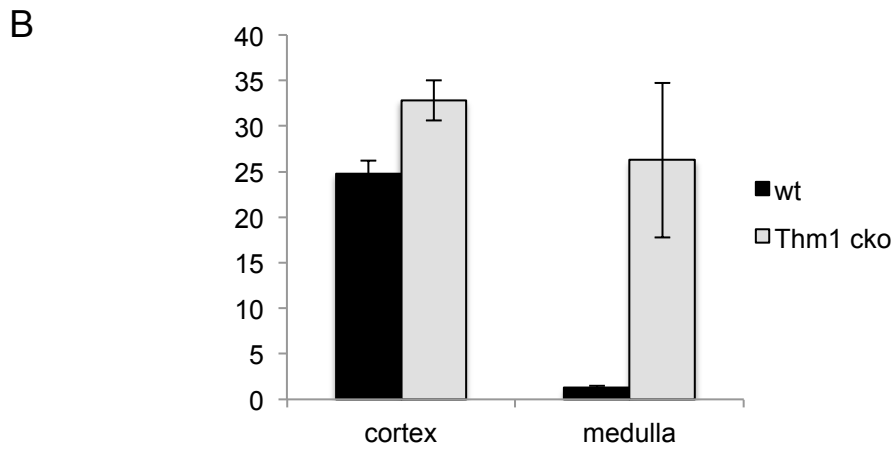

**Figure S3. Deletion of *Thm1* at 5 weeks of age does not cause renal cysts 3 months following deletion**

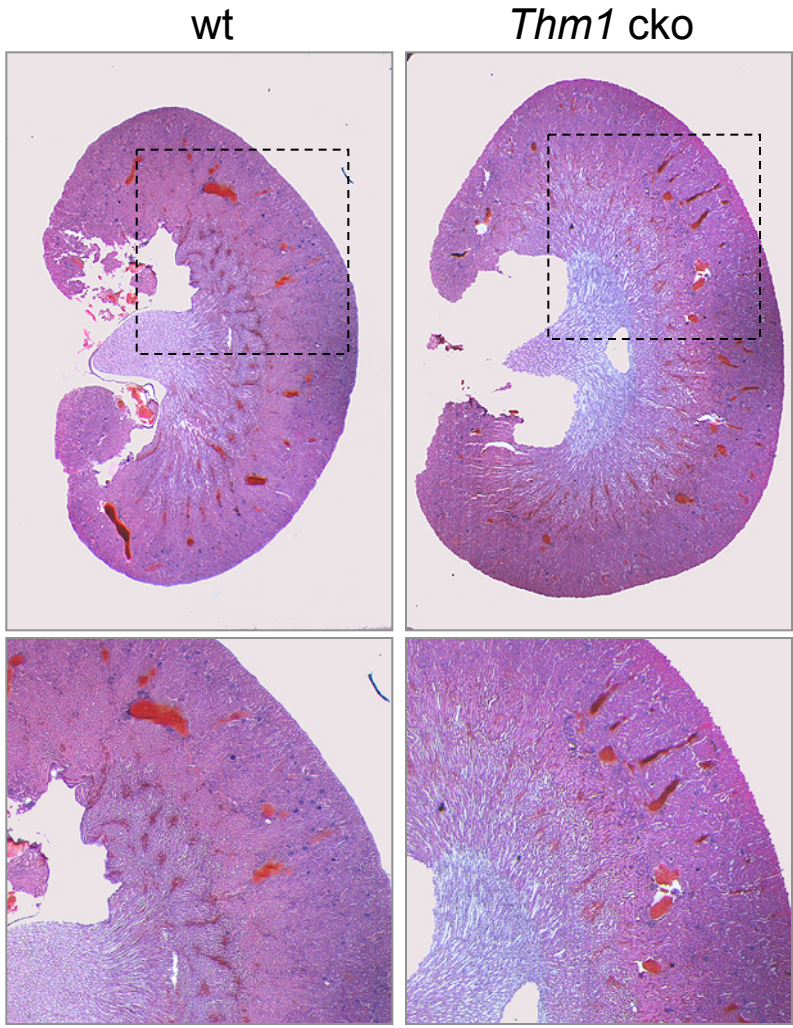

**Figure S4. GLI protein levels are similar between wt and *Thm1<sup>aln/aln</sup>* whole kidney extracts**

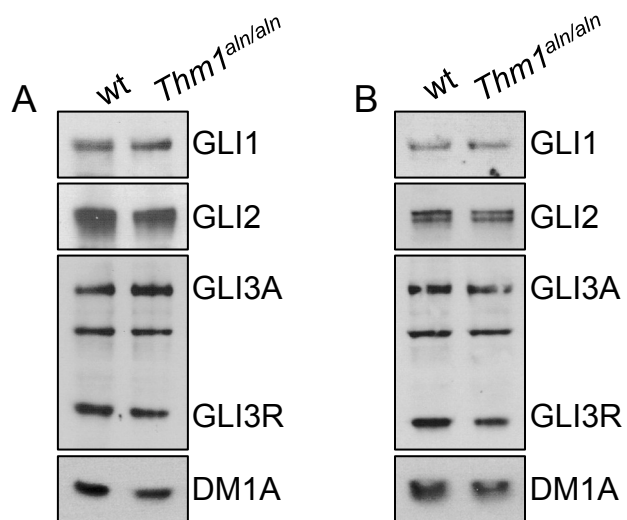



**Figure S5. Small molecule Wnt inhibitors do not reduce cystogenic potential in CD-1 kidneys cultured with cAMP**

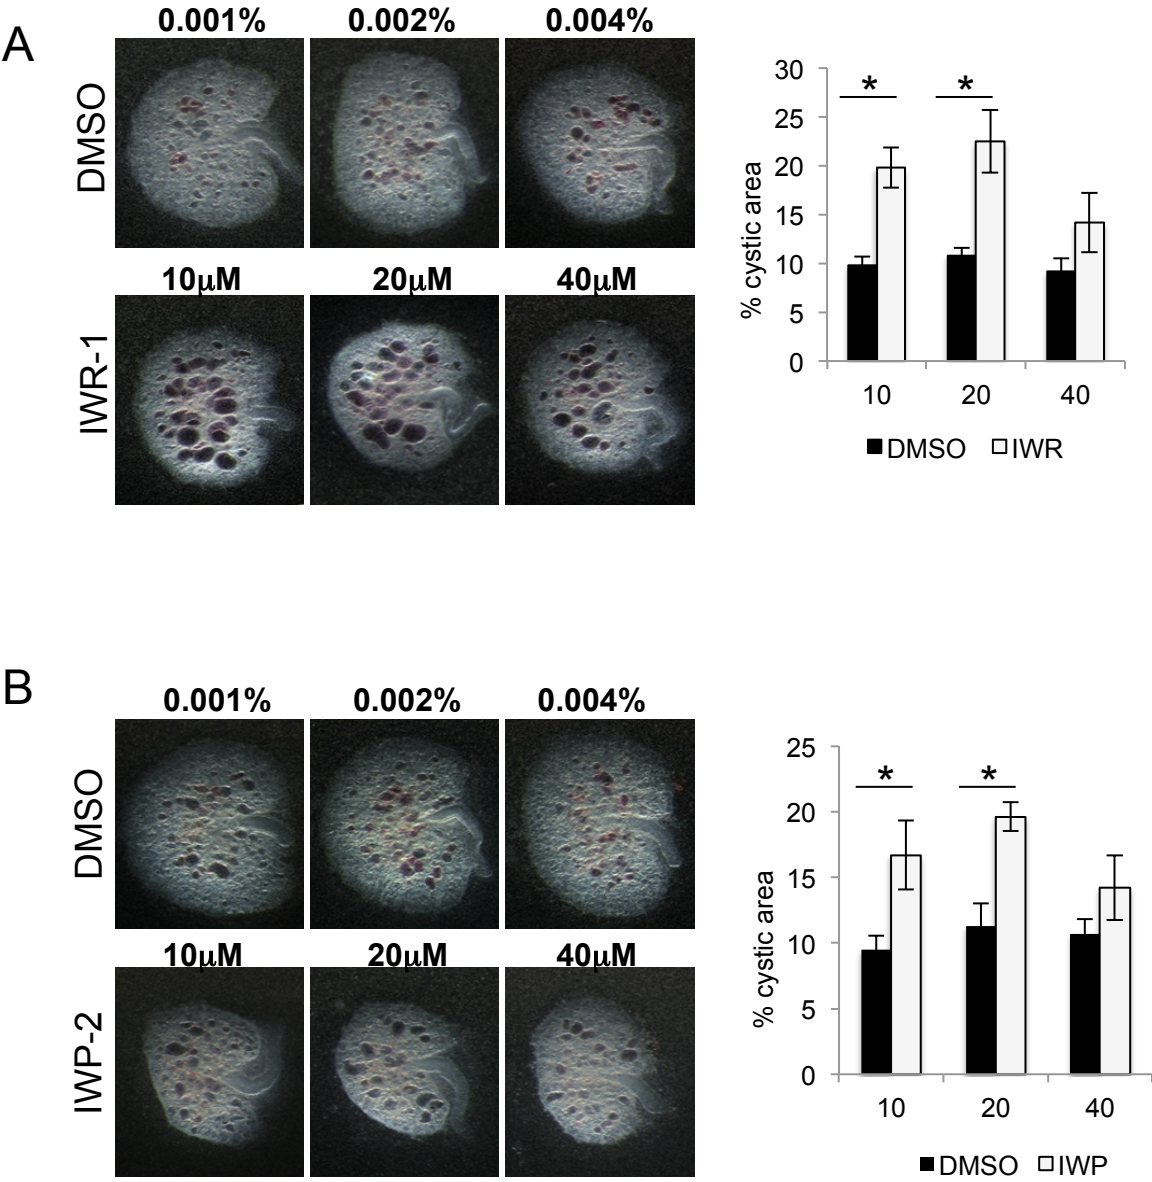



**Figure S6. SMO inhibitor, SANT1, prevents tubular dilation in CD1 kidneys cultured with cAMP**

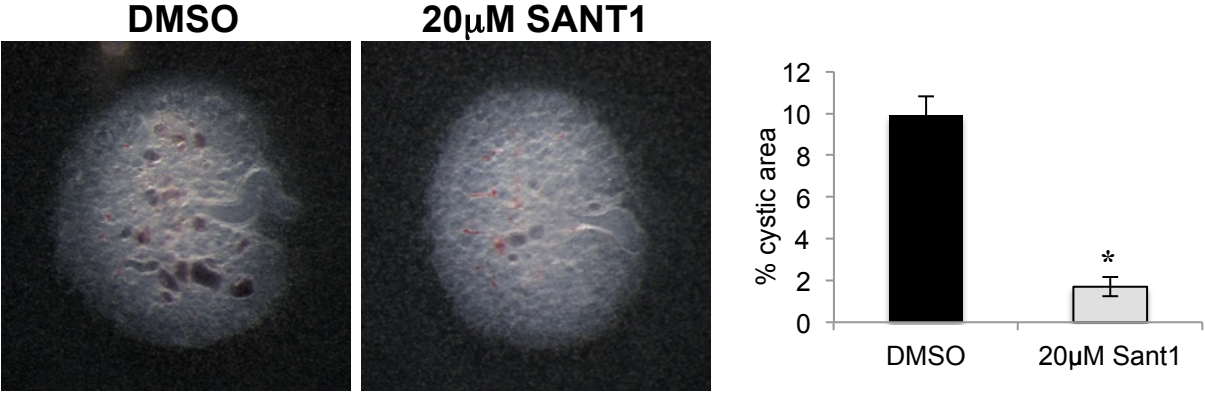

Supplement: ASN.2013070735_ASN2013070735SupplementaryData.pdf [file ASN.2013070735_ASN2013070735SupplementaryData.pdf]
